1 **Relationship of drought severity index with climatic factors on the Tibetan Plateau**

2 Xiangtao Wang<sup>1,2,\*</sup>, Guangyu Zhang<sup>1,2</sup>, Jingsheng Wang<sup>2,\*</sup>

3 *1 XiZang Agriculture and Animal Husbandry College, Linzhi, Tibet 860000, China*

4 *2 Lhasa Plateau Ecosystem Research Station, Key Laboratory of Ecosystem Network Observation and*

5 *Modeling, Institute of Geographic Sciences and Natural Resources Research, Chinese Academy of Sciences,*

6 *Beijing 100101, China*

7 \*Author to whom correspondence should be addressed; Xiangtao Wang, [wxt\\_11@163.com](mailto:wxt_11@163.com), Jingsheng

8 Wang, [wangjsh@igsrr.ac.cn](mailto:wangjsh@igsrr.ac.cn); Tel.: +86-10-64888176; Fax: +86-10-64854230

9

10 **Acknowledgments** We thank the Data Sharing Infrastructure of Earth System Science in China and the China  
11 Meteorological Data Sharing Service System for providing vegetation type maps and climatic data, respectively.  
12 This work was supported by the National Key Research Projects of China [Nos. 2017YFA0604801;  
13 2016YFC0502006], National Natural Science Foundation of China [Nos. 31600432, 41571042, 41761008], the  
14 Science and Technology Plan Projects of Tibet Autonomous Region (Forage Grass Industry) and Youth  
15 Innovation Research Team Project of Key Laboratory of Ecosystem Network Observation and Modeling  
16 (LENOM2016Q0002).

18 **Abstract** It remains unclear how drought is varying under climatic change. Quantifying the relationship between  
19 drought and climatic factors is crucial for predicting future drought risk under global climatic change.  
20 Correlations of annual drought severity index (DSI) with climatic factors were examined from 2000 to 2011 on  
21 the Tibetan Plateau. Spatially averaged DSI increased with increasing precipitation and minimum relative  
22 humidity, but decreased with increasing sunshine. The degrees of correlation between DSI and climatic factors  
23 varied with vegetation types. The change magnitude of DSI decreased with increasing temperature, precipitation  
24 and vapor pressure, but increased with increasing wind speed and sunshine. Therefore, clarifying the correlation  
25 between drought and climatic change need consider ecosystem types and their local climate on the Tibetan  
26 Plateau.

27 **Keywords:** climatic change; ecosystem types; precipitation; sunshine; air humidity; temperature

## 28 **1 Introduction**

29 Drought is an important climatic event and is generally linked to water availability, temperature, sunshine  
30 and wind speed [1-4]. Generally, water availability plays an important role for terrestrial ecosystems and drought  
31 has an adverse effect on vegetation growth [2,5-7]. Several studies have focused on how drought is changing  
32 under climatic change; however, non-uniform results on this question have been reported based on models and  
33 observations [3,8,9]. Knowledge of the relationship between drought and climatic change is crucial for  
34 predicting future changes in aridity and managing drought severity [2,3,10].

35 The Tibetan Plateau is one region most sensitive to climatic change [11-13]. Approximately two-third of the  
36 Tibetan Plateau are arid and semiarid regions [5]. The arid and semiarid regions may get drier under climatic  
37 change [14]. Under the background of global warming, the Tibetan Plateau is experiencing obvious warming and  
38 the warming magnitude is much greater than the global average [11,12]. It is expected that climatic warming  
39 could exacerbate drought when drought occurs [3]. Several recent studies indicate that decreased magnitude of

40 soil moisture caused by experimental warming is negatively related to warming magnitude of soil temperature  
41 [\[10,15,16\]](#). These findings imply that the drought risk may be more extensive and its magnitude may be greater  
42 on the Tibetan Plateau compared to other regions of the world. Actually, [\[17\]](#) have found that the increasing  
43 drought risk on the Tibetan Plateau is much higher than the average in China.

44 Climatic change varies with vegetation types on the Tibetan Plateau [\[18-20\]](#). To our knowledge, no studies have  
45 focused on the comparing the correlations between inter-annual variation of drought index and climatic change  
46 among vegetation types over the Tibetan Plateau. Moreover, previous studies have mainly discussed the correlation  
47 of drought index with temperature and precipitation rather than other climatic factors (e.g. vapor pressure, relative  
48 humidity, wind speed and sunshine hours) on the Tibetan Plateau [\[21,22\]](#). Recently, the Moderate Resolution  
49 Imaging Spectroradiometer (MODIS) developed a new drought index, called drought severity index (DSI), using  
50 the MODIS-derived actual and potential evapotranspiration, and normalized difference vegetation index [\[2\]](#),  
51 which facilitates analyses of the drying conditions and associated relationships with climatic factors at global and  
52 regional scales. In this study, we used MODIS DSI data and meteorological data to: (1) analyze and compare the  
53 inter-annual variation of DSI and its relationships with climatic factors among the main terrestrial ecosystems;  
54 and (2) analyze whether climatic warming has a negative effect on DSI on the Tibetan Plateau.

## 55 **2 Materials and methods**

### 56 *2.1 Study area*

57 The Tibetan Plateau is called ‘Third Pole of the Earth’ and its unique features includes high altitude (mean  
58 altitude above 4000 m), high air transparency, strong solar radiation, thin air and low temperature [\[23,24\]](#).  
59 Alpine meadows, alpine steppes, temperate steppes, forests, shrubland and croplands are main vegetation types  
60 [\[15,25\]](#).

## 61 **2.2 MODIS DSI data**

62 In this study, DSI data were obtained from the Moderate Resolution Imaging Spectroradiometer (MODIS)  
63 drought severity index product. The spatial and temporal resolutions are  $0.05^{\circ} \times 0.05^{\circ}$  and one year, respectively.  
64 The images in 2000–2011 on the Tibetan Plateau were adopted. Inconsistent with most previous drought indices,  
65 the vegetation responses are incorporated in the DSI algorithm [2]. The MODIS global DSI product has been  
66 validated [2].

## 67 **2.3 Climatic data**

68 We obtained climatic data from China Meteorological Data Sharing Service System. In this study, 69  
69 meteorological stations (22 in alpine meadows, 8 in alpine steppes, 4 in temperate steppes, 7 in forests, 12 in  
70 shrublands and 16 in croplands) were used. Climatic data included five temperature factors [(annual average air  
71 temperature ( $T_a$ ), maximum air temperature (MAT), minimum air temperature (MIT), extreme maximum air  
72 temperature (EMAT), and extreme minimum air temperature (EMIT) ], two precipitation factors [annual total  
73 precipitation (TP), and maximum precipitation (MAP)], four humidity factors [annual average vapor pressure  
74 ( $E_a$ ), relative humidity (RH), minimum relative humidity (MIRH), and vapor pressure deficit (VPD)], two  
75 sunshine factors [annual percentage of sunshine (SP) and total sunshine hours (SH)] and annual average wind  
76 speed (WS).

## 77 **2.4 Data analysis**

78 The vegetation type map (1:1000000 scale) was firstly transformed into a raster file ( $0.05^{\circ} \times 0.05^{\circ}$  spatial  
79 resolution) before any other associated analyses. We used a trend analysis to analyze changes in DSI,  $T_a$ , MAT,  
80 MIT, EMAT, EMIT, TP, MAP,  $E_a$ , RH, MIRH, VPD, SP, SH and WS. We used a correlation analysis to  
81 analyze the relationship between DSI and climatic factors [18]. All the spatial analyses were performed using the  
82 ArcGIS (version 9.3) [18].

## 83 **3 Results and discussion**

### 84 *3.1 Climatic factor changes*

85 Annual climate became warming and drying from 2000 to 2011 based on these meteorological records on the  
86 Tibetan Plateau (Figure S1). In detail, based on the data from all the 69 meteorological stations, spatially  
87 averaged Ta, MAT and MIT increased at 0.07, 0.09 and 0.07 °C·yr<sup>-1</sup>, respectively. Spatially averaged MAP  
88 exhibited an increase at 0.33 mm·yr<sup>-1</sup>. Spatially averaged Ea and RH exhibited a decrease at -0.04 hpa·yr<sup>-1</sup> and  
89 -0.01 yr<sup>-1</sup>, respectively. Spatially averaged VPD increased at 0.01 hpa·yr<sup>-1</sup>.

90 Climate changes varied with vegetation types (Figure S1), which was in line with previous studies [18,19,26]. In  
91 general, the climate showed a warming and drying from 2000 to 2011 across meteorological stations in alpine  
92 meadows, alpine steppes, forests and shrublands, but a drying in temperate steppes and croplands. The climate also  
93 became warming if considering the significant increase of MAT or MIT in croplands and temperate steppes. A  
94 dimming occurred in alpine steppes and temperate steppes, but a brightening occurred in shrublands.

95 In detail, spatially averaged Ta increased at 0.08, 0.09, 0.07 and 0.08 °C·yr<sup>-1</sup> in alpine meadows, alpine steppes,  
96 forests and shrublands, respectively. Spatially averaged MAT increased at 0.09, 0.07, 0.11 and 0.11 °C·yr<sup>-1</sup> in  
97 alpine meadows, croplands, forests and shrublands, respectively. Spatially averaged MIT increased at 0.09, 0.12,  
98 0.07, 0.07 and 0.07 °C·yr<sup>-1</sup> in alpine meadows, alpine steppes, temperate steppes, forests and shrublands,  
99 respectively. Spatially averaged TP increased at 5.95 and 6.50 mm·yr<sup>-1</sup> in alpine steppes and temperate steppes,  
100 respectively. Spatially averaged MAP increased at 0.38 and 0.72 mm·yr<sup>-1</sup> in alpine meadows and shrublands,  
101 respectively. Spatially averaged Ea decreased at -0.02, -0.03, -0.07 and -0.07 hpa·yr<sup>-1</sup> in alpine steppes,  
102 croplands, forests and shrublands, respectively. Spatially averaged RH decreased at -0.006, -0.007, -0.003,  
103 -0.004, -0.007 and -0.009 yr<sup>-1</sup> in alpine meadows, alpine steppes, temperate steppes, croplands, forests and  
104 shrublands, respectively. Spatially averaged MIRH increased at 0.003 yr<sup>-1</sup> in temperate steppes and at 0.002 yr<sup>-1</sup>

105 in croplands. Spatially averaged VPD increased at 0.07, 0.08, 0.04, 0.07, 0.12 and 0.13 hpa·yr<sup>-1</sup> in alpine  
106 meadows, alpine steppes, temperate steppes, croplands, forests and shrublands, respectively. Spatially averaged  
107 SP increased at 0.002 yr<sup>-1</sup> in shrublands, but decreased at -0.003 yr<sup>-1</sup> in temperate steppes. Spatially averaged  
108 SH increased at 8.49 hours·yr<sup>-1</sup> in shrublands, whereas spatially averaged SH decreased at -12.1 and -11.8  
109 hour·yr<sup>-1</sup> in alpine steppes and temperate steppes, respectively. Spatially averaged WS increased at 0.02  
110 m·s<sup>-1</sup>·yr<sup>-1</sup> in croplands.

### 111 **3.2 DSI changes**

112 Spatially averaged DSI change during the past 12 years varied with vegetation types (Figure 1). Only  
113 spatially averaged DSI in forests decreased at approximately -0.039 yr<sup>-1</sup>. This was in line with the fact that  
114 the decreasing magnitude of TP and the increasing magnitude of VPD in forests was the largest among the  
115 six vegetation types.

116 Inter-annual DSI change during the past 12 years varied among the 69 stations (Figure 2). Eight stations  
117 exhibited a decrease at rates from -0.13 to -0.09 yr<sup>-1</sup>. In contrast, only the Wudaoliang station exhibited an  
118 increase at 0.10 yr<sup>-1</sup>. This finding was in line with previous studies which indicated that the change of water  
119 availability varied with stations during the past years on the Tibetan Plateau [18,19].

120 The Southern Tibetan Plateau exhibited a drying trend, while the Northern Tibetan Plateau exhibited a  
121 wetting trend (Figure 2). This finding was in line with previous studies [5,18,27].

122 The DSI change decreased with increasing Ta, MAT, MIT, EMAT, EMIT, TP, MAP and Ea, but increased  
123 with increasing SP, SH and WS (Figure S3). These findings implied that DSI was more responsive to warming  
124 in colder environments, to water availability in drier environments and to sunshine conditions in lighter  
125 environments. The DSI was also more responsive when the wind speed is high. Therefore, clarifying the  
126 correlation between DSI and water availability need consider the local climate conditions.

127 The DSI change exhibited a positive relationship with TP change, but negative correlations with changes of  
128 MAT, EMAT, EMIT, SP and SH (Figure 3). Likewise, recent studies found that a higher experimental warming  
129 resulted in a greater environmental drying [10,15,16]. These findings indicated that warming magnitude and  
130 change magnitude of water availability exhibited quite the opposite effects on DSI change. The negative effect of  
131 sunshine conditions change magnitude on DSI change also dampened the positive effect of water availability  
132 change magnitude on DSI change. These findings suggested that DSI change was correlated with the changes  
133 and background values of climatic factors.

134 Climatic factor changes and background values differed among the six vegetation types or among the 69  
135 meteorological stations (Figure S1, S2), which was in line with previous studies conducted on the Tibetan  
136 Plateau [18-20]. Therefore, different inter-annual DSI variations may be attributed to different climatic changes  
137 and background values of climatic factors among the six vegetation types or among the 69 meteorological  
138 stations.

### 139 *3.3 Relationships between DSI and climatic factors*

140 Over all the 69 meteorological stations, spatially averaged DSI was positively related to spatially averaged  
141 TP and MIRH, but negatively correlated to SP and SH (Table 1). Therefore, DSI can mirror the condition of  
142 water availability and the increase of sunshine probably resulted in drying over the meteorological stations [2].

143 Spatially averaged DSI increased with increasing TP in alpine meadows, alpine steppes and shrublands  
144 (Table 1). Spatially averaged DSI exhibited a positive correlation with Ea in alpine meadows, forests and  
145 shrublands (Table 1). Spatially averaged DSI decreased with increasing VPD, but increased with increasing RH  
146 in forests and shrublands (Table 1). Spatially averaged DSI exhibited a positive relationship with MIRH in  
147 alpine meadows and shrublands (Table 1). These findings implied that DSI can mirror the dynamic of water  
148 availability at ecosystem scale. However, the degree of correlations between DSI and climatic factors related to

149 water availability varied with vegetation types ([Table 1](#)). Therefore, clarifying the correlation between DSI and  
150 water availability need consider ecosystem types.

151 Spatially averaged DSI decreased with increasing  $T_a$ , MAT and EMAT in forests and shrublands ([Table 1](#)).  
152 Spatially averaged DSI also exhibited a negative correlation with MIT and EMIT in forests ([Table 1](#)). These  
153 findings indicated that climatic warming may result in drying at ecosystem scale, which was in line with  
154 previous studies [[28-30](#)].

155 Spatially averaged DSI exhibited a negative correlation with SP and SH in alpine meadows, alpine steppes,  
156 croplands, forests and shrublands ([Table 1](#)), which implied that the increase of sunshine may cause drying at  
157 ecosystem scale.

158 Generally, correlations between DSI and climatic factors varied among the 69 stations ([Figure S4](#)). Three  
159 stations were mainly pre-dominated by wind speed, 26 stations were mainly pre-dominated by temperature  
160 factors; 11 stations were mainly pre-dominated by precipitation factors; 15 stations were mainly pre-dominated  
161 by air humidity factors; and 14 stations were mainly pre-dominated by sunshine factors. Most stations exhibited  
162 positive correlations between DSI and water availability, and negative correlations between DSI and sunshine  
163 conditions. Most stations also exhibited negative correlations of DSI with MAT and EMAT. More than half  
164 stations exhibited negative correlations of DSI with  $T_a$ , MIT and EMIT. These findings indicated that DSI can  
165 mirror water availability at station scale. Moreover, both climatic warming and the increase of sunshine resulted  
166 in drying at most stations. This finding was in line with previous studies conducted on the Tibetan Plateau  
167 [[31-33](#)]. For example, Yu et al. [[34](#)] demonstrated that experimental warming increased soil temperature by  
168 approximately 1–1.4 °C, but decreased soil moisture by approximately 4% in an alpine meadow in Northern Tibet.

#### 169 **4. Conclusions**

170 The main conclusions are as follows: (1) different vegetation types exhibited different correlations between  
171 DSI and climatic factors, which may be attributed to different changes and background values in climatic factors  
172 among vegetation types; and (2) the degree of correlation between DSI and climatic change was stronger in  
173 colder, drier, higher wind speed and sunshine environments.

#### 174 **References**

- 175 1. Dai AG (2011) Drought under global warming: a review. *Wiley Interdisciplinary Reviews-Climate Change* 2:  
176 45-65.
- 177 2. Mu QZ, Zhao MS, Kimball JS, McDowell NG, Running SW (2013) A remotely sensed global terrestrial  
178 drought severity index. *Bulletin of the American Meteorological Society* 94: 83-98.
- 179 3. Trenberth KE, Dai AG, van der Schrier G, Jones PD, Barichivich J, et al. (2014) Global warming and changes  
180 in drought. *Nature Climate Change* 4: 17-22.
- 181 4. Fu G, Zhang HR, Sun W (2019) Response of plant production to growing/non-growing season asymmetric  
182 warming in an alpine meadow of the Northern Tibetan Plateau. *Science of the Total Environment* 650:  
183 2666-2673.
- 184 5. Wang M, Zhou CP, Wu L, Xu XL, Ou YH (2013) Wet-drought pattern and its relationship with vegetation  
185 change in the Qinghai-Tibetan Plateau during 2001-2010. *Arid Land Geography* 36: 49-56.
- 186 6. Fu G, Sun W, Yu CQ, Zhang XZ, Shen ZX, et al. (2015) Clipping alters the response of biomass production to  
187 experimental warming: a case study in an alpine meadow on the Tibetan Plateau, China. *Journal of Mountain  
188 Science* 12: 935-942.
- 189 7. Fu G, Shen ZX, Zhang XZ (2018) Increased precipitation has stronger effects on plant production of an alpine  
190 meadow than does experimental warming in the Northern Tibetan Plateau. *Agricultural and Forest  
191 Meteorology* 249: 11-21.

- 192 8. Dai AG (2013) Increasing drought under global warming in observations and models. *Nature Climate Change*  
193 3: 52-58.
- 194 9. Sheffield J, Wood EF, Roderick ML (2012) Little change in global drought over the past 60 years. *Nature* 491:  
195 435-+.
- 196 10. Yu CQ, Wang JW, Shen ZX, Fu G (2019) Effects of experimental warming and increased precipitation on  
197 soil respiration in an alpine meadow in the Northern Tibetan Plateau. *Science of the Total Environment* 647:  
198 1490-1497.
- 199 11. Fu G, Shen ZX, Sun W, Zhong ZM, Zhang XZ, et al. (2015) A meta-analysis of the effects of experimental  
200 warming on plant physiology and growth on the Tibetan Plateau. *Journal of Plant Growth Regulation* 34:  
201 57-65.
- 202 12. IPCC (2013) Summary for Policymakers. In: *Climate Change 2013: The Physical Science Basis.*  
203 *Contribution of Working Group I to the Fifth Assessment Report of the Intergovernmental Panel on Climate*  
204 *Change* [Stocker, T.F., D. Qin, G.-K. Plattner, M. Tignor, S.K. Allen, J. Boschung, A. Nauels, Y. Xia, V.  
205 Bex and P.M. Midgley (eds.)]. Cambridge University Press, Cambridge, United Kingdom and New York,  
206 NY, USA.
- 207 13. Wu JS, Fu G (2018) Modelling aboveground biomass using MODIS FPAR/LAI data in alpine grasslands of  
208 the Northern Tibetan Plateau. *Remote Sensing Letters* 9: 150-159.
- 209 14. Seager R, Naik N, Vecchi GA (2010) Thermodynamic and Dynamic Mechanisms for Large-Scale Changes  
210 in the Hydrological Cycle in Response to Global Warming. *Journal of Climate* 23: 4651-4668.
- 211 15. Zhong ZM, Shen ZX, Fu G (2016) Response of soil respiration to experimental warming in a highland barley  
212 of the Tibet SpringerPlus 5: doi: 10.1186/s40064-40016-41761-40060.
- 213 16. Shen ZX, Wang JW, Sun W, Li SW, Fu G, et al. (2016) The soil drying along the increase of warming mask

- 214 the relation between temperature and soil respiration in an alpine meadow of Northern Tibet. Polish Journal  
215 of Ecology 64: 125-129.
- 216 17. Wang L, Chen W (2014) A CMIP5 multimodel projection of future temperature, precipitation, and  
217 climatological drought in China. International Journal of Climatology 34: 2059-2078.
- 218 18. Shen ZX, Fu G, Yu CQ, Sun W, Zhang XZ (2014) Relationship between the growing season maximum  
219 enhanced vegetation index and climatic factors on the Tibetan Plateau. Remote Sensing 6: 6765-6789.
- 220 19. Fu G, Li SW, Sun W, Shen ZX (2016) Relationships between vegetation carbon use efficiency and climatic  
221 factors on the Tibetan Plateau. Canadian Journal of Remote Sensing 42: 16-26.
- 222 20. Wang SH, Sun W, Li SW, Shen ZX, Fu G (2015) Interannual variation of the growing season maximum  
223 normalized difference vegetation index, MNDVI, and its relationship with climatic factors on the Tibetan  
224 Plateau. Polish Journal of Ecology 63: 424-439.
- 225 21. Liu DK, Wang JB, Qi SH (2014) Analysis on dry trend based on moisture index in Qinghai province in the  
226 recent 35 years. Research of Soil and Water Conservation 21: 246-250.
- 227 22. Yang XH, Zhuo G, Luo B (2014) Drought monitoring in the Tibetan Plateau based on MODIS dataset.  
228 Journal of Desert Research 34: 527-534.
- 229 23. Fu G, Wu JS (2017) Validation of MODIS Collection 6 FPAR/LAI in the alpine grassland of the Northern  
230 Tibetan Plateau. Remote Sensing Letters 8: 831-838.
- 231 24. Zhang XZ, Shen ZX, Fu G (2015) A meta-analysis of the effects of experimental warming on soil carbon and  
232 nitrogen dynamics on the Tibetan Plateau. Applied Soil Ecology 87: 32-38.
- 233 25. Fu G, Shen ZX (2017) Effects of enhanced UV-B radiation on plant physiology and growth on the Tibetan  
234 Plateau: a meta-analysis. Acta Physiologiae Plantarum 39: doi: 10.1007/s11738-11017-12387-11738.
- 235 26. Wang SH, Sun W, Li SW, Shen ZX, Fu G (2015) Interannual variation of the growing season maximum

- 236 normalized difference vegetation index, MNDVI, and its relationship with climatic factors on the Tibetan  
237 Plateau. *Polish Journal of Ecology* 63: 291-306.
- 238 27. Zhang L, Guo HD, Ji L, Lei LP, Wang CZ, et al. (2013) Vegetation greenness trend (2000 to 2009) and the  
239 climate controls in the Qinghai-Tibetan Plateau. *Journal of Applied Remote Sensing* 7:  
240 doi:10.1117/1111.jrs.1117.073572.
- 241 28. Yu CQ, Han FS, Fu G (2019) Effects of 7 years experimental warming on soil bacterial and fungal  
242 community structure in the Northern Tibet alpine meadow at three elevations. *Science of the Total  
243 Environment* 655: 814-822.
- 244 29. Fu G, Shen ZX, Zhang XZ, Zhou YT (2012) Response of soil microbial biomass to short-term experimental  
245 warming in alpine meadow on the Tibetan Plateau. *Applied Soil Ecology* 61: 158-160.
- 246 30. Fu G, Shen ZX (2017) Clipping has stronger effects on plant production than does warming in three alpine  
247 meadow sites on the Northern Tibetan Plateau. *Scientific Reports* 7: doi:  
248 10.1038/s41598-41017-16645-41592.
- 249 31. Fu G, Shen ZX (2016) Environmental humidity regulates effects of experimental warming on vegetation  
250 index and biomass production in an alpine meadow of the Northern Tibet. *PLoS ONE* 11:  
251 10.1371/journal.pone.0165643.
- 252 32. Shen ZX, Li YL, Fu G (2015) Response of soil respiration to short-term experimental warming and  
253 precipitation pulses over the growing season in an alpine meadow on the Northern Tibet. *Applied Soil  
254 Ecology* 90: 35-40.
- 255 33. Fu G, Zhang XZ, Zhang YJ, Shi PL, Li YL, et al. (2013) Experimental warming does not enhance gross  
256 primary production and above-ground biomass in the alpine meadow of Tibet. *Journal of Applied Remote  
257 Sensing* 7: 10.1117/1111.jrs.1117.073505.

- 258 34. Yu CQ, Shen ZX, Zhang XZ, Sun W, Fu G (2014) Response of soil C and N, dissolved organic C and N, and  
259 inorganic N to short-term experimental warming in an Alpine meadow on the Tibetan Plateau. Scientific  
260 World Journal 2014: 10.1155/2014/152576.  
261

263 **Table 1.** Correlation coefficients for spatially averaged annual drought severe index (DSI) with spatially averaged annual  
 264 average temperature (Ta), maximum temperature (MAT), minimum temperature (MIT), extreme maximum temperature  
 265 (EMAT), extreme minimum temperature (EMIT), total precipitation (TP), maximum precipitation (MAP), average vapor  
 266 pressure (Ea), average relative humidity (RH), minimum relative humidity (MIRH), average vapor pressure deficit  
 267 (VPD), percentage of sunshine (SP), sunshine hours (SH) and wind speed (WS) from 2000 to 2011 at 69 meteorological  
 268 stations on the Tibetan Plateau

| Vegetation Types  | Ta      | MAT     | MIT     | EMAT   | EMIT   | TP    | MAP   | Ea     | RH     | MIRH    | VPD     | SP       | SH       | WS    |
|-------------------|---------|---------|---------|--------|--------|-------|-------|--------|--------|---------|---------|----------|----------|-------|
| Alpine meadows    | -0.11   | -0.42   | 0.26    | -0.43  | -0.08  | 0.59* | 0.20  | 0.67*  | 0.50   | 0.71**  | -0.35   | -0.85*** | -0.87*** | 0.49  |
| Alpine steppes    | 0.28    | -0.07   | 0.58*   | -0.36  | 0.20   | 0.70* | 0.19  | 0.07   | -0.17  | -0.35   | 0.23    | -0.74**  | -0.74**  | 0.19  |
| Temperate steppes | 0.20    | 0.10    | 0.25    | 0.04   | 0.57   | 0.42  | -0.19 | 0.29   | -0.16  | 0.07    | 0.34    | -0.23    | -0.19    | 0.18  |
| Croplands         | -0.34   | -0.48   | -0.14   | -0.55  | -0.05  | 0.43  | -0.22 | 0.36   | 0.50   | 0.26    | -0.49   | -0.90*** | -0.91*** | 0.26  |
| Forests           | -0.71** | -0.77** | -0.73** | -0.63* | -0.69* | 0.54  | 0.24  | 0.74** | 0.78** | -0.04   | -0.76** | -0.66*   | -0.65*   | -0.02 |
| Shrublands        | -0.66*  | -0.78** | -0.51   | -0.61* | -0.36  | 0.66* | -0.43 | 0.69*  | 0.75** | 0.83*** | -0.73** | -0.75**  | -0.75**  | 0.03  |
| All types         | -0.28   | -0.49   | -0.03   | -0.40  | -0.11  | 0.61* | -0.18 | 0.54   | 0.50   | 0.74**  | -0.42   | -0.86*** | -0.86*** | 0.31  |

269 \*, \*\* and \*\*\* indicate  $p < 0.05$ ,  $p < 0.01$  and  $p < 0.001$ , respectively.

270

271

272

273

274

275

276

277

278

279

280 **Figure legend**

281 **Figure 1.** Linear trends for drought severe index (DSI) from 2000 to 2011 over the entire Tibetan Plateau

282 **Figure 2.** Drought severity index trends from 2000 to 2011 on the Tibetan Plateau; (a) significance test; and (b)  
283 regression slope.

284 **Figure 3.** Relationships between several factors: (a) linear trend of annual drought severe index (Slope\_DSI) and linear  
285 trend of annual maximum temperature (Slope\_MAT); (b) Slope\_DSI and linear trend of annual extremely maximum  
286 temperature (Slope\_EMAT); (c) Slope\_DSI and linear trend of annual extremely minimum temperature (Slope\_EMIT);  
287 (d) Slope\_DSI and linear trend of annual precipitation (Slope\_TP); (e) Slope\_DSI and linear trend of annual sunshine  
288 percentage (Slope\_SP); and (f) Slope\_DSI and linear trend of annual sunshine hours (Slope\_SH).
